1 **Diverse strategies for tracking seasonal environmental niches at hemispheric scale**

2

3 **Jeremy Cohen\*<sup>1,2</sup> & Walter Jetz<sup>1,2</sup>**

4

5 <sup>1</sup>Department of Ecology and Evolutionary Biology, Yale University, 165 Prospect Street, New  
6 Haven, CT, 06520 USA

7 <sup>2</sup>Center for Biodiversity and Global Change, Yale University, 165 Prospect Street, New Haven,  
8 CT, 06520 USA

9

10 \*Correspondence to: [jeremy3cohen@gmail.com](mailto:jeremy3cohen@gmail.com)

11

12 **Author emails (in order of authorship):** [jeremy3cohen@gmail.com](mailto:jeremy3cohen@gmail.com), [walter.jetz@yale.edu](mailto:walter.jetz@yale.edu)

13

14 **Author statement:** All authors agreed to submission of the manuscript and accept the  
15 responsibility for the accuracy and integrity of the manuscript.

16

17 **Author contributions:** All authors devised ideas for the study. JMC compiled annotated GBIF  
18 data. JMC calculated niche similarity metrics. JMC accessed functional trait databases and  
19 harmonized phylogenetic information. JMC conducted statistical analyses and generated figures.  
20 All authors helped write the manuscript.

21

22 **Keywords:** Environmental niche, climatic niche, hypervolume, seasonal niche tracking, birds,  
23 big data, seasonality, migration, functional trait groups, phylogenetic signal, GBIF

24

25

26 **Abstract:**

27

28 Species depend upon a constrained set of environmental conditions, or niches, for survival and  
29 reproduction that are increasingly lost under climatic change. Seasonal environments require  
30 species to either track their niches via movement or undergo physiological or behavioral changes  
31 to survive. Here we identify the tracking of both environmental niche position and breadth across  
32 619 New World bird species and assess their phylogenetic and functional underpinning.  
33 Partitioning niche position and breadth tracking can inform whether climatic means or extremes  
34 limit seasonal distributions. We uncover diverse strategies, including the tracking of niche  
35 position, breadth, both, or neither, suggesting highly variable sensitivity to ongoing climatic  
36 change. There was limited phylogenetic determinism to this variation, but a strong association  
37 with functional attributes that differed between niche position and breadth tracking. Our findings  
38 imply significant functional consequences for communities and ecosystems as impending climate  
39 change affects some niche tracking strategies more than others.

40

## 41 Introduction

42

43 Species survive and reproduce under a specific set of environmental conditions, known as the  
44 environmental niche or  $n$ -dimensional hypervolume (Blonder et al. 2014; Hutchinson 1957; Lu,  
45 Winner, and Jetz 2021). In seasonal environments, species must adjust to a constantly shifting  
46 window of available conditions through one of several strategies. When remaining stationary,  
47 species must either maintain tolerance to a wide range of conditions or undergo physiological  
48 and behavioral changes to survive seasonal variation, known as ‘niche switching’ (Nakazawa et  
49 al. 2004). Alternatively, seasonally mobile animals can occupy a dynamic niche that remains  
50 relatively narrow across the annual cycle, known as ‘niche tracking’ (Gómez et al. 2016;  
51 Somveille, Rodrigues, and Manica 2018; Winger et al. 2019). Seasonal niche tracking is central  
52 to the persistence of species with limited behavioral or physiological capacity to adjust their  
53 niches (Fandos et al. 2020; Zurell et al. 2018). Understanding the functional and phylogenetic  
54 drivers of niche tracking behavior across diverse species can allow researchers to predict how  
55 species mediate exposure to novel, potentially adverse conditions as climate change progresses  
56 (Tingley et al. 2009; La Sorte and Jetz 2012; Somveille, Rodrigues, and Manica 2015).

57 After the documentation of seasonal niche tracking behavior in single species (Fandos et al.  
58 2020) and smaller clades (Gómez et al. 2016; Eyres et al. 2020), a more general understanding of  
59 the patterns, causes and consequences of seasonal niche tracking across diverse taxonomic  
60 groups remains missing. For example, the role of phylogeny and functional traits in driving  
61 seasonal niche tracking across a diverse species set remains largely unexplored (but see Zurell et  
62 al. 2018). Several studies have hypothesized that niche tracking may be phylogenetically  
63 conserved (Gómez et al. 2016; Martínez–Meyer, Townsend Peterson, and Navarro–Sigüenza  
64 2004), as is typical of behavioral and migratory traits (Outlaw and Voelker 2006), but this has  
65 not been evaluated rigorously or broadly. Alternatively, niche tracking may have repeatedly  
66 evolved in tandem with species’ functional traits. For example, obligate insectivores or small-  
67 bodied species may be most likely to closely track their niche over the annual cycle to satisfy  
68 narrow dietary or thermal requirements (Gómez et al. 2016; Huey et al. 2012). Separating these  
69 potential drivers will allow researchers to better predict niche flexibility and niche tracking, and  
70 thus climate change vulnerability, among rare species or those from under-sampled regions.

71 Previous work on niche tracking has focused on seasonal similarity in niche positions, or mean  
72 environmental conditions, without accounting for niche components such as niche breadth (the  
73 volume or range of tolerable conditions). However, niche breadth is a central additional  
74 dimension because climate change is altering both the means and variances of climatic  
75 conditions (Rahmstorf and Coumou 2011). For example, species may seasonally track niche  
76 breadth instead of changing the central niche position when extremes are more limiting to their  
77 survival and reproductive success than climatic means, as is the case for numerous species  
78 (Albright et al. 2010; Ummenhofer and Meehl 2017). Thus, species may use the tracking of  
79 niche breadth as an alternative strategy to niche position tracking to persist in the face of

80 seasonality, one unexplored by the existing niche tracking literature, which instead considers  
81 niche breadth as an annually static variable (Gómez et al. 2016; Zurell et al. 2018). To better  
82 identify complex variation in niche tracking, seasonal niche similarity should be partitioned into  
83 constituent components, including *niche position similarity*, or the distance between niche  
84 centroids, representing the difference between the average conditions a species experiences in  
85 each season; and *niche breadth similarity*, or the proportional difference in niche breadths (Lu,  
86 Winner, and Jetz 2021), representing the range of conditions a species can tolerate.  
87 Hypervolumes quantified using non-parametric techniques, such as kernel-density estimates or  
88 support vector machines (Blonder 2018; Brown, Holland, and Jordan 2020), are difficult to  
89 partition into constituent components. However, recently developed parametric methods for  
90 quantifying the niche allow for partitioning of these components and direct hypothesis testing  
91 against predictions derived from theories (Lu, Winner, and Jetz 2021).

92 We use these new metrics to distinguish five primary strategies for seasonal niche tracking (Fig.  
93 1; Fig. 2): i) “Non-trackers” retain neither the position nor the breadth of their niches over the  
94 annual cycle; ii) “Breadth trackers”, or “position shifters”, track niche breadth but shift their  
95 position, suggesting that their seasonal ranges may be limited by environmental variation; iii)  
96 “Position trackers”, or “breadth expanders”, track only niche position and adjust niche breadth  
97 between seasons and may be seasonally limited by environmental means; Finally, “complete  
98 trackers” track both niche position and breadth, but may do so by either iv) migrating to track  
99 weather conditions across the annual cycle or v) remaining stationary in an aseasonal  
100 environment.

101 However, a simple comparison of niche space during the breeding and overwintering seasons  
102 (henceforth, *seasonal* niche similarity) cannot fully distinguish these strategies (Fig. 1b, columns  
103 4-5), despite obviously divergent dispersal capability and potential for climate change adaptation  
104 (Eyres et al. 2020). We therefore consider an additional metric, *locational* niche similarity, in  
105 which the realized overwintering hypervolume is compared with that had the species remained at  
106 its breeding range, its *stationary winter niche* (Fig. 1c). This measure, which emphasizes the  
107 similarity of conditions at specific locations, is important for understanding seasonal niche  
108 tracking because it accounts for the environmental distance covered by the species through  
109 purposeful movement. Among temperate breeders, seasonal and locational niche similarity are  
110 likely to have an inverse relationship; for example, a niche tracking species with little difference  
111 between its breeding and overwintering niche is likely to experience highly distinct  
112 overwintering conditions compared with those at its breeding sites.

113

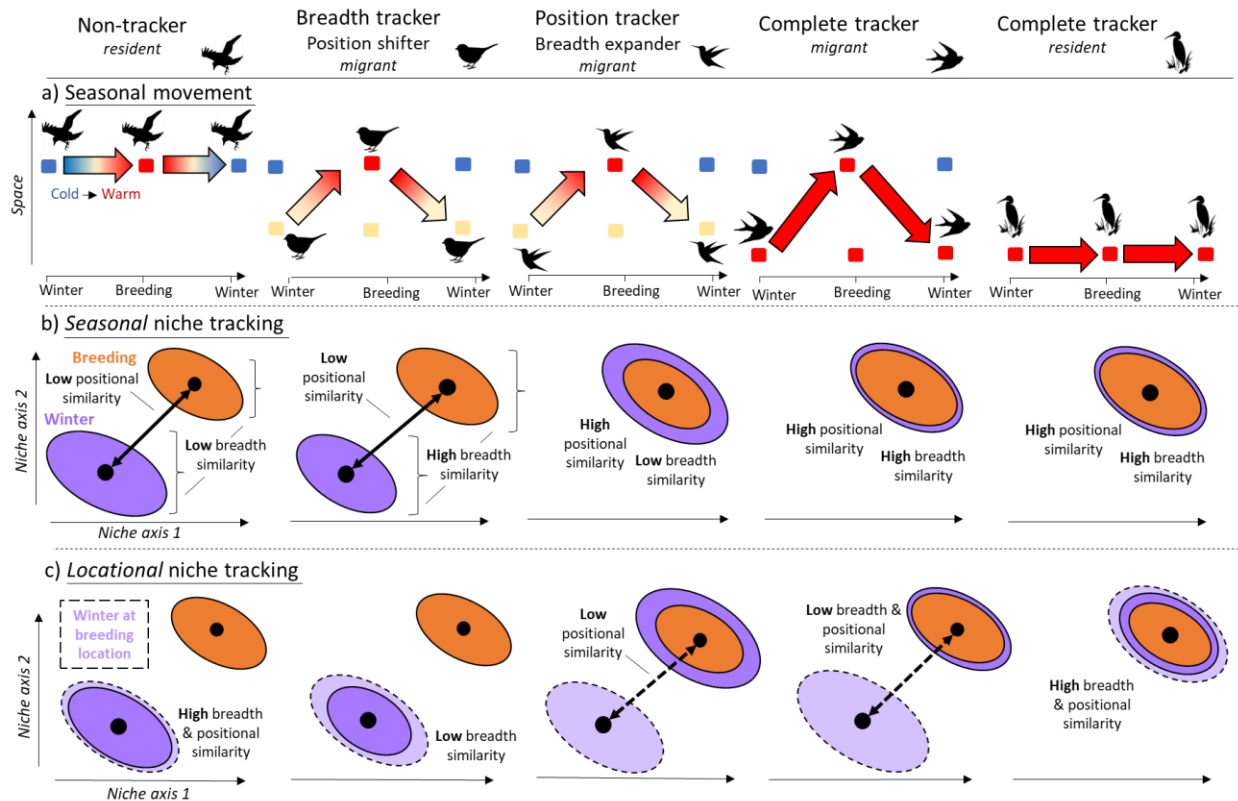

114

115

116

117

118

119

120

121

122

123

124

**Figure 1: A typology of seasonal niche tracking strategies.** Seasonal niche similarity is decomposed into two components, similarity in niche position and niche breadth. A given species may (1) be a non-tracker, tracking neither niche position or breadth, (2) track niche breadth, but shift position, (3) track niche position, but expand breadth, or (4-5), be a complete tracker, tracking both niche position and breadth. a) shows the differing use of climate zones over space and time; b) compares seasonal niches between the breeding (orange) and overwintering (purple) seasons (solid arrows represent positional similarity, and brackets represent breadth similarity); c) compares the location of the winter conditions at breeding locations (light purple) and the overwintering niche, revealing that for strategy 4 and 5 niche tracking is achievable through multiple life history strategies. Dashed arrows represent locational positional similarity.

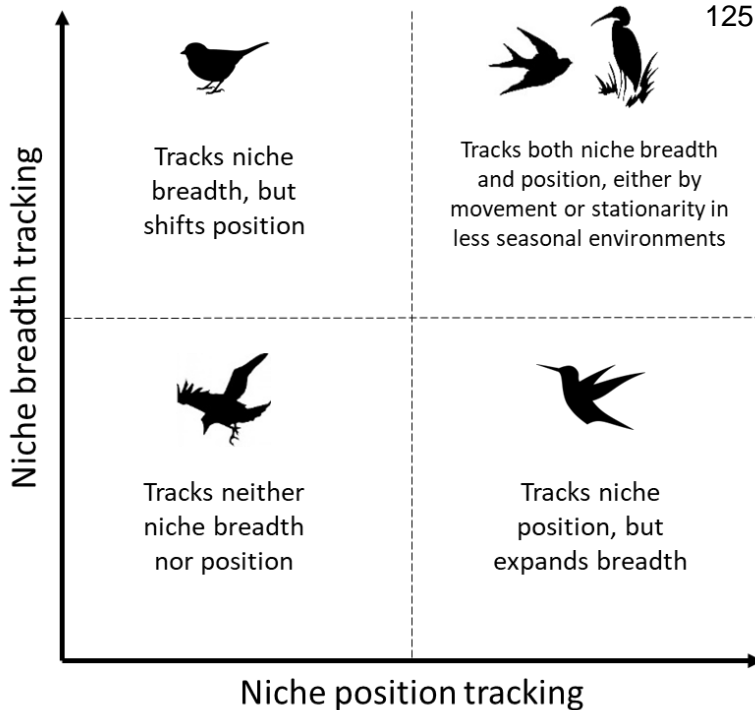

126

127 **Figure 2. Five niche tracking strategies.** Conceptual schematic outlining the contribution of  
128 niche breadth and position tracking to each of five possible niche tracking strategies.

129

130 Here, we use a hemispheric system to address patterns and drivers of these strategies;  
131 specifically, 619 bird species, representing nearly the full diversity of birds breeding in the US  
132 and Canada. This species set is ideally suited given its tremendous variation in migratory  
133 strategy, diversity of functional trait groups (Barnagaud et al. 2017) and uniquely comprehensive  
134 occurrence data. We also leverage a recently developed environmental annotation tool (Li et al.  
135 2021) and a novel parametric hypervolume method (Lu, Winner, and Jetz 2021) to quantify  
136 similarity between the environmental niches occupied by each species during both the breeding  
137 and overwintering seasons. We use this system to address the following questions:

138 1) What is the prevalence of different niche tracking strategies while accounting for both niche  
139 position and breadth? To date, a quantitative multi-species assessment of strategies across a  
140 diverse taxonomic group has been missing.

141 2) What is the relationship between the tracking of niche position and the tracking of niche  
142 breadth? Do species that maximize niche positional similarity across seasons also tend to retain  
143 similar niche breadth, or do species largely track only one or the other?

144 3) How phylogenetically and functionally determined are niche tracking strategies? Across  
145 functional trait groups, we hypothesize seasonal niche tracking to be most common in a) long-  
146 distance migrants, because they can physically relocate to suitable locations (Laube, Graham,  
147 and Böhning-Gaese 2015; Zurell et al. 2018); b) small-bodied species, because they have low  
148 thermal inertia and generally narrow thermal breadths (Huey et al. 2012; Albright et al. 2017),  
149 suggesting they cannot tolerate large seasonal variation in the niche; c) insectivores, because  
150 abundant insect prey is only available under specific temperature, precipitation and productivity  
151 levels (Winkler, Luo, and Rakhimberdiev 2013); and d) species occupying open or water  
152 habitats, because they are not shielded from climate variability by forest structure (Jarzyna et al.  
153 2016). Given that behavioral and migratory traits are often phylogenetically conserved (Outlaw  
154 and Voelker 2006), we expect a strong phylogenetic signal in seasonal niche tracking behavior  
155 (Gómez et al. 2016).

156 4) Do cross-species comparisons of *locational* niche similarity reveal important behavioral  
157 strategies and functional or phylogenetic associations not apparent when quantifying only  
158 *seasonal* niche similarity? We predict an inverse relationship between seasonal and locational  
159 similarity across species and expect to observe functional trait relationships with locational  
160 similarity that are not observed with temporal similarity.

161 We expect the emerging insights to not only address these questions but more generally offer an  
162 assessment of seasonal niche dynamics as a system to understand realized strategies for  
163 mitigating exposure to climatic change.

164

## 165 **Material and Methods**

166

### 167 *Species selection and environmental data*

168 We identified the 672 bird species that annually breed or overwinter in the United States and  
169 Canada based on American Birding Association birding codes (Association 2008) updated to the  
170 Clements bird taxonomy as of 2021 (Clements 2007). These codes are a widely-accepted  
171 authority to distinguish regularly occurring species from irregularly occurring vagrants, or those  
172 species which sporadically appear on the continent each year but whose occurrence is not  
173 predictably tied to a given location. We excluded species not native to the US or Canada or those  
174 that are primarily marine, for which weather data is unavailable.

175 In August 2021, we accessed the Spatiotemporal Observation Annotation Tool (STOAT) v1.0, a  
176 novel cloud-based toolbox for flexible biodiversity annotations (Li et al. 2021), to download  
177 annotated Global Biodiversity Information Facility data (<https://www.gbif.org/>) for all species  
178 (data compilation, analyses and visualizations were all completed in R 4.1.0; R Core Team  
179 2021). To minimize the potential for spatiotemporal sampling bias, we then thinned points by  
180 selecting one point from each location (5x5km grid cell) per week.

181 We annotated observation points with three environmental dimensions: daily maximum  
182 temperature (sourced from NASA-MODIS; <https://lpdaac.usgs.gov/products/mod11a1v006/>),  
183 enhanced vegetation index (EVI; from MODIS), and precipitation (from CHELSA v2.1; Karger  
184 et al. 2021), each summarized to a 1km buffer (0.5km radius) over 30 days prior to the  
185 observation (imported using jsonlite and httr packages; Ooms 2014; Wickham and Wickham  
186 2020). We did not assess *a priori* whether these variables are equally relevant across species; for  
187 example, certain species may be limited by precipitation but not temperature within their range,  
188 or *vice versa*. Alternatively, some species may be limited by environmental factors not  
189 considered in our estimation of species niches. However, this variable set represents the  
190 environmental factors that most commonly drive species distributions (Qian 2010), and these  
191 variables have low collinearity, allowing each axis to remain independent. Estimating niches  
192 with the same variable set for all species was necessary to ensure consistency in cross-species  
193 evaluation of seasonal changes to both niche position and breadth.

194 For each species, we restricted observation points to those with environmental data available for  
195 all dimensions. Further, we temporally cropped data to season (December-February for the  
196 overwintering season and June-August for breeding season) and spatially cropped points to the  
197 American continents ( $< -30^\circ$  longitude). Sufficient data for analysis ( $>20$  points per season after  
198 filtering) was available for 619 species. Database management was completed using *tidyverse*  
199 packages (Wickham et al. 2019).

200 To quantify locational similarity, we conducted the same niche characterizations for breeding  
201 locations during the overwintering season. For each species, we created a hypothetical set of  
202 occurrence points corresponding to coordinate locations during the breeding season, each with  
203 randomized winter calendar dates (December-February), annotating them with environmental  
204 data as described above.

### 205 *Ecological niche modeling and seasonal similarity*

206 For every species, we calculated parametric measurements of the similarity between the seasonal  
207 three-dimensional hypervolumes. The hypervolumes were characterized as multivariate normal  
208 distributions, allowing us to derive analytical estimates for the breadth and position of each  
209 hypervolume (MVNH package; Lu, Winner, and Jetz 2021). We partitioned niche similarity into  
210 two metrics: i) *niche position similarity*, which quantifies the distance among hypervolume  
211 centroids in each season based on the sign-flipped, log-transformed Mahalanobis distance, used  
212 to assess changes in niche position between seasons; and ii) *niche breadth similarity*, which  
213 represents the similarity in *niche breadth* (volume) between seasons and is measured as the sign-  
214 flipped, log-transformed determinant ratio.

215 To quantify seasonal similarity, we calculated positional and breadth similarity between the  
216 breeding and overwintering seasonal hypervolumes. To quantify locational similarity, we  
217 calculated positional similarity between the overwintering hypervolume and available



218 hypervolume during winter at breeding locations. Thus, we had a total of three metrics of  
219 seasonal niche similarity per species. We visualized pairwise two-dimensional hypervolumes for  
220 each species using *ggplot2* (Wickham 2011).

### 221 *Functional traits and phylogeny*

222 We obtained species-level functional trait values and an avian phylogenetic tree to test  
223 associations between trait groups, phylogeny, and seasonal niche tracking. We derived migration  
224 distances from (La Sorte et al. 2022; La Sorte personal communication), body mass from the  
225 Eltonian trait database (Wilman et al. 2014), and habitat preference and diet from Barnagaud et  
226 al. (2017). We grouped several categories of each categorical predictor to avoid false positives  
227 associated with small sample sizes and to keep our conclusions broad. Diet categories included  
228 carnivore, invertebrate, omnivore, and herbivore (combining ‘fruit’, ‘nectar’, ‘vegetation’, and  
229 ‘seed’ categories). Habitat categories included water (‘coastal’, ‘open\_water’,  
230 ‘riparian\_wetlands’), open (‘semi-open’, ‘rock’, ‘arid’), generalist (‘urban’, ‘developed’), and  
231 forest.

232 We updated an avian phylogeny from Jetz et al. (2012) to account for recent taxonomic changes,  
233 updating species names to the Clements bird taxonomy as of 2021 (Clements 2007) and treating  
234 recently split species as having no phylogenetic distance (Appendix 2). We also harmonized  
235 species names in all trait datasets to Clements.

### 236 *Cross-species models*

237 To assess the role of functional traits in seasonal niche tracking, we used weighted multivariate  
238 phylogenetic generalized least squares (PGLS) models (*caper* package; Orme et al. 2013).  
239 Phylogenetically correlated model errors in PGLS account for the non-independence of the  
240 species due to their phylogenetic relatedness (Symonds and Blomberg 2014). The dependence of  
241 the model errors arises from trait axes that we did not include in the analysis and that may be  
242 subject to niche conservatism so that model errors reflect the unobserved trait and thus the  
243 phylogenetic distance between species. We used species’ similarity in niche position and breadth  
244 as the response variables in the models and explained their variation with categorical trait  
245 variables. Prior to use in models, continuous predictor variables (migration distance and log-  
246 transformed body mass) were scaled to improve model fit and response variables were log-  
247 transformed and sign-flipped (representing niche similarity rather than dissimilarity) to improve  
248 interpretability. We weighted all species points in models by log-transformed minimum sample  
249 size (number of points in the season with less data) to account for uncertainty in seasonal niche  
250 dissimilarity estimates (true error estimates are unavailable when estimating niche dissimilarity).  
251 We fit three models testing the relationships between the four functional traits and three metrics  
252 of niche similarity: seasonal niche position similarity, seasonal niche breadth similarity, and  
253 locational niche position similarity. To evaluate the reliability of multivariate models, we also fit  
254 univariate models for each combination of functional trait predictor and response variable.

255 To measure the role of phylogeny in both positional and breadth similarity, we quantified  
256 Blomberg's K (Blomberg, Garland Jr et al. 2003) and compared it to a null distribution of K after  
257 randomizing species' responses 1,000 times (picante package; Kembel et al. 2010).  $K < 1$   
258 suggests greater than expected phylogenetically-correlated variance within clades, while  $K > 1$   
259 suggests variance among clades (i.e., phylogenetically-conserved trait). We also quantified  
260 lambda to assess the extent of phylogenetic conservation of niche metrics via Brownian motion.  
261 We visualized relationships between niche metrics and functional traits using *ggplot2* (Wickham  
262 2011), *ggExtra* (Attali and Baker 2019) and *RcolorBrewer* (Neuwirth and Neuwirth 2011). We  
263 visualized partial residuals using *visreg* (Breheny, Burchett, and Breheny 2020).

264

## 265 **Results**

266

267 We found all five niche-tracking strategies represented among North American birds (Fig 3). For  
268 example, Red-bellied woodpeckers (*Melanerpes carolinus*; Fig. 3a) are largely stationary birds  
269 occupying highly seasonal environments, with low seasonal similarity between their breeding  
270 and overwintering niches, but high locational similarity between their overwintering and  
271 stationary winter niches. In contrast, Pine grosbeaks (*Pinicola enucleator*; Fig. 3b) are short-  
272 distance migrants and “breadth trackers”, tracking niche breadth while shifting position across  
273 seasons. Migratory Swainson's thrushes (*Catharus ustulatus*; Fig. 3c) are “position trackers”,  
274 tracking their niche position across seasons, but expanding their niche during the breeding  
275 season. Prothonotary warblers (*Protonotaria citrea*; Fig. 3d) are long-distance migrants that  
276 abandon breeding territories to closely track both niche components across seasons, resulting in  
277 high seasonal and low locational similarity. Finally, Great kiskadees (*Pitangus sulphuratus*; Fig.  
278 3e) are stationary tropical residents with conserved niches across the annual cycle, resulting in  
279 both high seasonal and high locational similarity. We select these species for visualizations  
280 because they represent each strategy well in both two-dimensional niche space (temperature and  
281 EVI only; Fig. 3) and three-dimensional space (remainder of results).

282

283 The 619 bird species analyzed spanned the full diversity of niche tracking strategies (Fig. 4;  
284 Appendix 1). Across seasons, the median positional similarity ( $-\log[\text{Mahalanobis distance}]$ ) was  
285  $-1.95 \pm 0.05$  SE (i.e., centroids approximately 3 SDs apart), suggesting that many species are  
286 not closely tracking this niche attribute over the annual cycle (Ponti et al. 2020). For 60 species  
287 (9.7%), centroids were within 1 SD, suggesting highly similar niches in each season for this  
288 subset. The median among-season similarity in niche breadth was  $2.17 \pm 0.03$ , equivalent to a  
289 4:1 ratio in niche breadth between seasons, suggesting that many species expand their niche  
290 breadths as they traverse seasons. 129 species (22%) had a niche breadth similarity equivalent to  
291 a  $< 2:1$  ratio, suggesting similarly-sized seasonal niches.

292

293

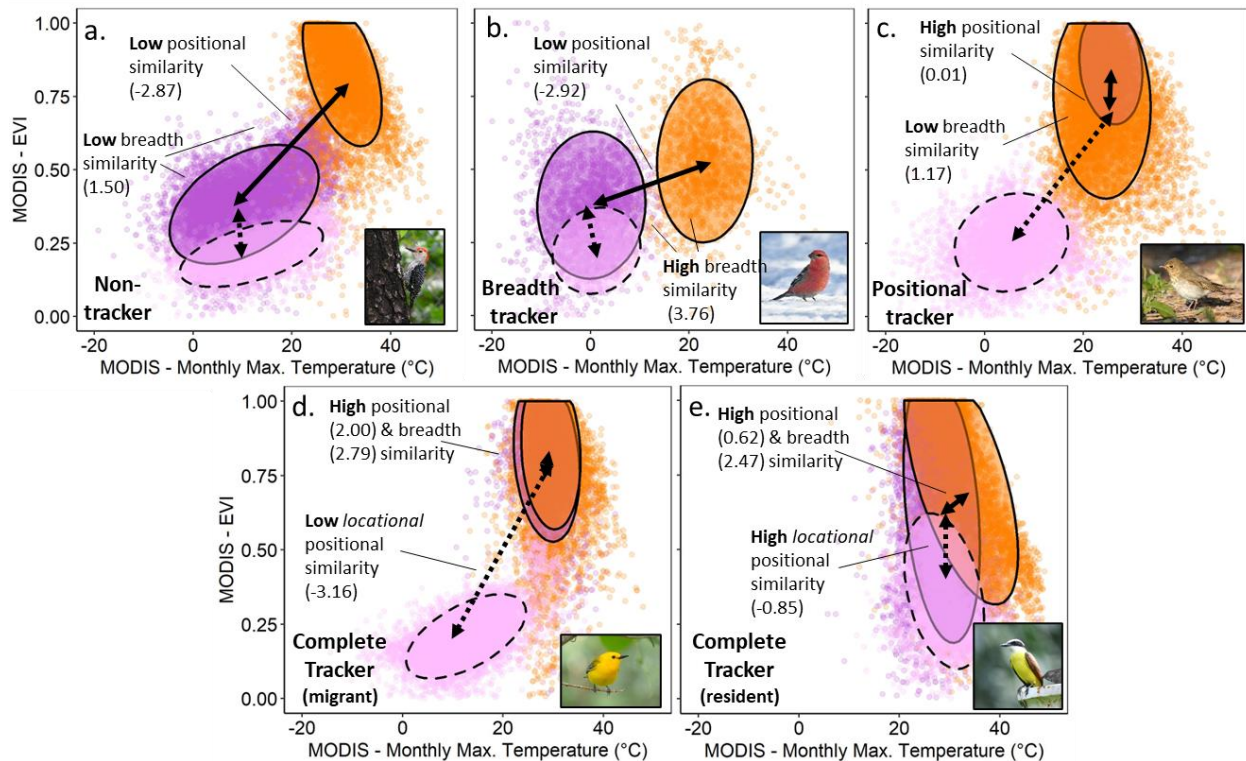

294

295 **Figure 3: Diverse niche tracking strategies.** (a) Red-bellied woodpeckers (*Melanerpes carolinus*) are  
 296 non-trackers, with low seasonal similarity (solid arrow) between their breeding (orange points and  
 297 ellipsoid) and overwintering (dark purple) two-dimensional niche (presented as standardized ellipse area).  
 298 Meanwhile, the difference between their overwintering niche and winter conditions at breeding locations  
 299 (light purple, dotted ellipsoid), or locational similarity (dotted arrow), is high. (b) Pine grosbeaks  
 300 (*Pinicola enucleator*) track their niche breadth but shift position across seasons, while (c) Swainson's  
 301 thrushes (*Catharus ustulatus*) track their niche position but expand niche breadth. (d) Prothonotary  
 302 warblers (*Protonotaria citrea*) closely track their niche across seasons via migration, resulting in high  
 303 seasonal and low locational similarity. (e) Great kiskadees (*Pitangus sulphuratus*) track their niche by  
 304 remaining stationary in less seasonal environments, leading to high seasonal and locational similarity.  
 305 Position and breadth similarity values are provided in parentheses. Note that this figure displays two-  
 306 dimensional niche space, though our statistical analyses consider three-dimensional niches, including  
 307 precipitation as additional dimension.

308

309 Tracking niche position was loosely tied to tracking niche breadth; species that tracked niche  
 310 position more often tracked niche breadth, and *vice versa* (Generalized linear model:  $\beta=0.179$ ,  
 311  $R^2=0.073$ ,  $p<0.001$ ; Fig. 4). 170 (27.5%) species were "complete" niche trackers, tracking both  
 312 position and breadth more than most species (positive values on both axes in Fig. 4), while 209  
 313 (33.8%) were non-trackers, tracking both less than others (negative values in Fig. 4). However,  
 314 numerous species tracked one but not the other (Fig. 4), suggesting a complex diversity of  
 315 approaches to seasonal niche tracking across bird species. Only 80 species (12.9%) tracked niche

316 position but expanded breadth, while double that number – 160 (25.8%) – tracked breadth but  
317 shifted position.  
318

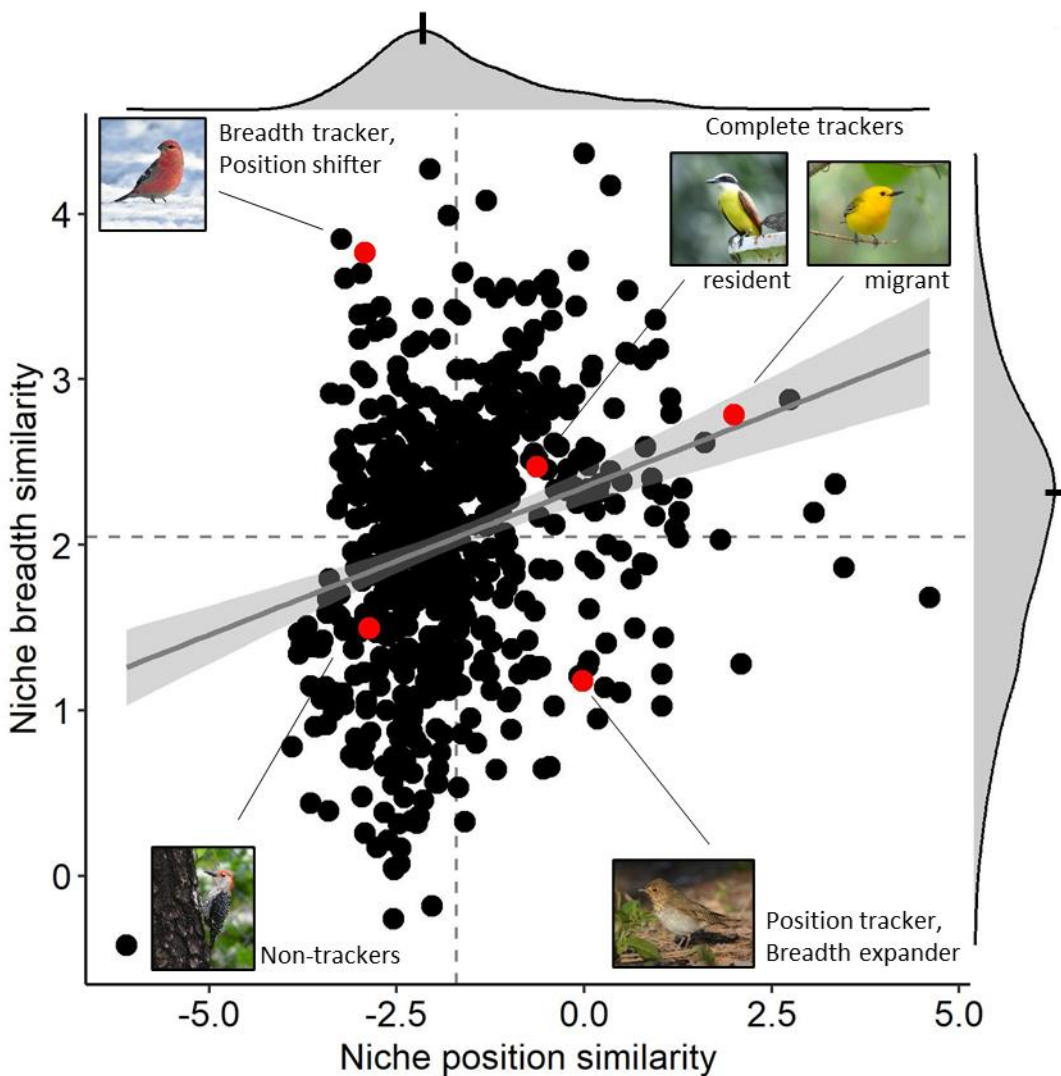

319  
320 **Figure 4: Interspecific variation in tracking niche position and breadth across seasons.** The figure  
321 shows niche similarities between the breeding and overwintering seasons for the 619 bird species  
322 analyzed based on three niche dimensions (for red highlights, see Fig. 3). Strategies of tracking niche  
323 position, breadth, both, or neither are partitioned into four categories (boxes separated by dashed lines).  
324 Dashed lines highlight the means. Marginal density plots illustrate that species tracking only one niche  
325 component often track niche breadth more closely than niche position, with medians represented by  
326 notches. The trendline represents a linear relationship between niche position and breadth similarity with  
327 associated 95% confidence interval (shading). See Fig. S2 for equivalent patterns for locational similarity.  
328  
329 We found seasonal niche tracking strategies to be closely associated with functional traits, and  
330 their role to be consistent across weighted multivariate models accounting for all traits and  
331 phylogenetic structure simultaneously (Fig. 5; Tables S1-S2) as well as univariate models

332 (Tables S3-S4). As expected, both niche positional and breadth similarity were very strongly  
333 linked to migration distance (Phylogenetic generalized least-squares models: position,  $\beta=0.43$ ,  
334  $p<0.001$ ; breadth,  $\beta=0.25$ ,  $p<0.001$ ), which was the strongest functional predictor; long-distance  
335 migrants were most likely to maximize similarity, while residents minimized similarity and  
336 others fell in the middle (Fig. 5a,d). Body mass emerged as another important functional  
337 predictor of seasonal niche tracking, especially with regards to positional similarity. Body mass  
338 negatively predicted niche position similarity ( $\beta=-0.80$ ,  $p<0.001$ ) and was positively associated  
339 with breadth similarity ( $\beta=0.53$ ,  $p<0.001$ ). Small-bodied birds maximized seasonal similarity,  
340 while large-bodied birds minimized it (Fig. 5b,e). Finally, both diet ( $F_{1,3}=5.70$ ,  $p<0.005$ ) and  
341 habitat preference ( $F_{1,3}=9.68$ ,  $p<0.001$ ) categories described variation in positional similarity,  
342 though only habitat preference drove breadth similarity ( $F_{1,3}=10.15$ ,  $p<0.005$ ). As predicted,  
343 insectivores maximized positional and breadth similarity, herbivores minimized these, and  
344 omnivores fell in the middle (Fig. 5c,g). Waterbirds tracked their niches more closely than other  
345 species (Fig. 5d,h).  
346

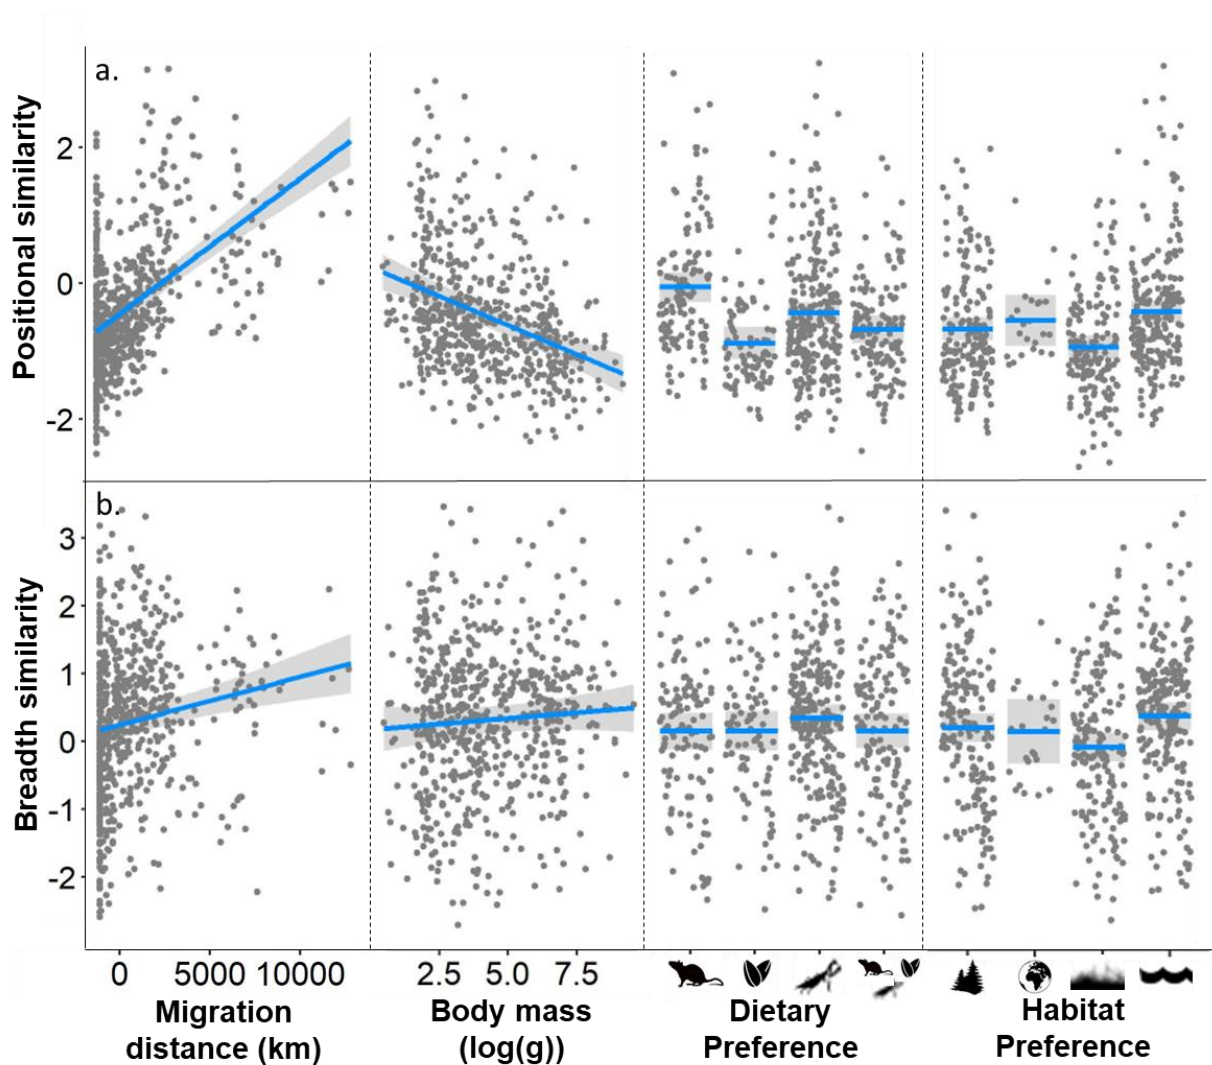

347

348 **Figure 5: Functional traits predict variation in seasonal niche tracking**, as shown by partial residual  
349 plots based on phylogenetic least-squares models. Y-axis values represent (a) positional and (b) breadth  
350 similarity. Silhouettes correspond to categorical functional trait values as follows: Dietary preference (left  
351 to right: carnivore, herbivore, insectivore, omnivore); Habitat preference (forest, generalist,  
352 open/grassland, water).

353

354 Surprisingly, we found little evidence of a phylogenetic signal in seasonal niche tracking. For  
355 both niche position and breadth, Within-group phylogenetic variation was greater and among-  
356 group variation lesser than expected by chance (Bloomberg's K always < 0.1; position:  $p < 0.001$ ;  
357 breadth:  $p = 0.10$ ; Table S5) and did not support Ornstein-Uhlenbeck trait evolution.

358 Measurements of lambda indicated a moderate phylogenetic signal for species tracking niche  
359 position ( $\lambda = 0.66$ ,  $p < 0.001$ ), suggesting possible Brownian-motion trait evolution, but little signal  
360 for niche breadth ( $\lambda = 0.28$ ,  $p < 0.001$ ).

361

362 Species that maximized seasonal niche similarity typically minimized locational niche similarity,  
363 and vice versa ( $\beta=-0.408$ ,  $R^2=0.237$ ,  $p<0.001$ ; Fig. S1). For locational similarity, the link  
364 between tracking niche position and niche breadth was stronger than for seasonal similarity, with  
365 42% of species tracking both components and 29% neither (Fig. S2). Only 15% of species  
366 tracked locational niche position but not breadth, and 13% tracked locational breadth but not  
367 position. Likewise, relationships between functional traits and locational positional similarity  
368 were generally opposite to those observed with seasonal positional similarity. Long-distance  
369 migrants ( $\beta=-0.331$ ,  $p<0.001$ ), small-bodied birds ( $\beta=0.95$ ,  $p<0.001$ ), and waterbirds ( $F_{1,3}=7.75$ ,  
370  $p<0.001$ ) each minimized locational positional similarity, though we found no effect of diet. As  
371 with seasonal similarity, we found no evidence for a phylogenetic signal in locational niche  
372 similarity (Table S5).

373

374

## 375 **Discussion**

376 For mobile organisms, seasonal niche tracking is a central part of the behavioral repertoire for  
377 mediating exposure to novel climate conditions. Here, we assessed the representation of distinct  
378 seasonal niche tracking strategies across North American breeding birds and evaluated the  
379 functional and phylogenetic drivers of these strategies. Our analyses revealed five distinct  
380 seasonal niche tracking strategies and their key functional drivers. We find that only a bit more  
381 than half of species can be categorized as either “complete trackers”, tracking both niche position  
382 and breadth across seasons, or “non-trackers”, tracking neither. However, almost 40% of species  
383 only track niche position or breadth, revealing complexity in niche tracking strategies that is  
384 previously unexplored in niche-tracking studies. Twice as many species tracked only niche  
385 breadth (26%) compared with those that tracked niche position and expanded niche breadth  
386 (13%), suggesting that tracking breadth is often a prerequisite for tracking position and that birds  
387 may be most specialized in terms of the range of environmental conditions they can tolerate  
388 rather than means. Importantly, niche tracking studies that do not consider niche breadth would  
389 likely have labeled the 26% of species that are niche breadth trackers as non-trackers, ignoring  
390 the role that niche breadth tracking and expansion plays in allowing species to persist over  
391 seasons. Species limited by extreme or highly variable weather conditions rather than climatic  
392 means may be more apt to prioritize niche breadth tracking while allowing niche position to  
393 seasonally fluctuate. Meanwhile, a species with inflexible thermal or dietary requirements that is  
394 specialized only during certain parts of the year (e.g., due to strict breeding requirements) may  
395 track niche position but not breadth. However, further work is needed to pinpoint the ecological  
396 motivations behind selection of breadth tracking as a niche tracking strategy.

397 We found that migration distance was the most important functional driver of seasonal niche  
398 tracking, despite this link previously receiving mixed support among cross-species niche tracking  
399 studies (Zurell et al. 2018; Laube, Graham, and Böhning-Gaese 2015; Gómez et al. 2016).

400 Although several studies (Gómez et al. 2016; Laube, Graham, and Böhning-Gaese 2015) failed

401 to detect a link between migration and niche tracking, their approaches compared species within  
402 single families, including residential species that are exclusively tropical. Because these residents  
403 occupy relatively stable environments, they can track their niches despite being stationary (Eyres  
404 et al. 2020). This example helps illustrate why migration distance and niche tracking are less  
405 correlated than might be expected – tropical residents can track their niches well despite their  
406 stationarity, while long-distance migrants may experience high seasonal variation despite their  
407 migration if they annually move between arctic breeding grounds and boreal or temperate  
408 wintering grounds. Indeed, although migration distance was the strongest correlate of seasonal  
409 niche tracking in our study, the correlation was moderate ( $R^2=0.249$ ).

410  
411 Body size was revealed as the next most important functional trait associated with seasonal niche  
412 tracking when controlling for other traits. Small-bodied birds may not be able to tolerate large  
413 variation in their thermal niches because they have low thermal inertia (Huey et al. 2012;  
414 Albright et al. 2017). Further, small-bodied animals have shown greater sensitivity to extreme  
415 weather events (Cohen, Fink, and Zuckerberg 2021) and more rapidly alter phenological timing  
416 in tune with interannual weather variability (Cohen, Lajeunesse, and Rohr 2018) compared with  
417 large-bodied animals, suggesting that they must carefully maintain thermal limits. Additionally,  
418 small-bodied birds may be more likely to evolve niche-tracking strategies dependent on seasonal  
419 migration because long-distance flight carries lower energetic costs than it does for large birds  
420 (Watanabe 2016).

421  
422 Finally, diet and habitat preference were additional meaningful drivers of seasonal niche tracking  
423 behavior, with insectivores and carnivores tracking their niches more than herbivores and  
424 omnivores, and waterbirds more so than other species. Insectivores may prioritize niche-tracking  
425 because they are dependent upon prey that is most commonly available under specific thermal  
426 and productivity limits (Winkler, Luo, and Rakhimberdiev 2013). Surprisingly, carnivores  
427 tracked their niche positions even more closely than insectivores, but many of these species are  
428 preying on herpetofauna also active during warm weather. Though we predicted both open and  
429 water habitat specialists to be the strongest niche trackers, as they are less shielded from the  
430 external environment by habitat structure (Jarzyna et al. 2016), only water birds tracked their  
431 niche more closely than other groups (Fig 4d,h). Bird species that occupy open habitats may  
432 make greater use of microhabitat structure than water birds, which are typically exposed (e.g.,  
433 (Shew, Nielsen, and Sparling 2019)).

434  
435 Although many studies have assumed seasonal niche tracking to be phylogenetically conserved  
436 (Gómez et al. 2016; Martínez–Meyer, Townsend Peterson, and Navarro–Sigüenza 2004), this  
437 has not to our knowledge been evaluated over a large, diverse taxonomic group such as North  
438 American breeding birds. There are several explanations as to why we did not detect a  
439 phylogenetic signal. First, migratory behavior has arisen in numerous, diverse lineages of birds,  
440 and is flexible even within species (Zink 2011). Second, closely related species often occupy



441 distinct climatic zones that vary greatly in seasonality, especially if speciation resulted from  
442 character displacement (Newton 2003). Finally, species-level exposure to and adaptation  
443 potential for climate change may be quite independent from phylogeny (Khaliq et al. 2015;  
444 Davis et al. 2010). Based on our analyses, we conclude that functional traits likely play a larger  
445 role than phylogeny in driving seasonal niche tracking in birds.

446  
447 Complex variation among niche tracking strategies cannot fully be assessed via seasonal niche  
448 comparisons; for example, a species that niche-tracks via movement and a stationary species in  
449 an aseasonal environment have similar seasonal niches. To parse these strategies, we estimated  
450 locational niche similarity, or the similarity between overwintering niches and the *stationary*  
451 *winter niche* for each species. Species with high seasonal similarity often had low locational  
452 similarity, and *vice versa*, reflecting a trade-off between conserving niches and ranges  
453 throughout the annual cycle. While many species tracked only niche position or breadth between  
454 seasons, species adhered to locationally tracking both or neither components much more often,  
455 with few tracking just one. Therefore, species may be leaving breeding areas in winter for the  
456 purposes of modifying both the mean and variance of environmental conditions. We observed  
457 several key differences between functional trait relationships and either seasonal or locational  
458 niche similarity. For instance, migration distance and body size were equally important as drivers  
459 of locational niche similarity, possibly because large-bodied birds are especially reluctant to  
460 energetically invest in movement (Watanabe 2016). Further, in contrast with seasonal niche  
461 similarity, there was no effect of diet on locational similarity, perhaps because food availability  
462 depends more on environmental conditions themselves rather than the distance birds travel to  
463 track them. Thus, we demonstrate the importance of considering both seasonal and locational  
464 similarity in species niches to understand variation in niche tracking strategies.

465  
466 We estimated niche metrics at the species level to effectively compare niche tracking strategies  
467 across a taxonomic group as broad and diverse as birds and to make use of the enormous  
468 quantity of available species-level occurrence data. However, we did not explore niche variation  
469 as experienced at lower levels of organization, including populations, demographic groups, and  
470 individuals (Fandos et al. 2020; Fandos and Tellería 2020; Carlson et al. 2021). Populations of  
471 species with wide geographic ranges might be adapted to highly distinct environmental  
472 conditions (Broggi et al. 2005). Within a population, demographic groups can also occupy  
473 different niches – sexes can occupy spatially distinct regions during the nonbreeding season, or  
474 young can be shielded in microclimate during breeding season (Shipley et al. 2020). Finally,  
475 individuals may track different niche components than populations (Fandos et al. 2020) or might  
476 have strong variation in their ecological niches during different parts of the year and thus vary in  
477 niche-tracking. For example, individual white storks (*Ciconia ciconia*) and sandhill cranes  
478 (*Antigone canadensis*) range from subtropical residents to short-distance migrants to longer-  
479 distance migrants moving between northern temperate and tropical zones each year (Krapu et al.  
480 2014; Fandos et al. 2020; Carlson et al. 2021). Summarizing niche tracking strategies at the

481 species level may limit our inferential ability in two ways: 1) species-level niche breadth is likely  
482 greater than individual niche breadth given variability in individual niches (Carlson et al. 2021),  
483 and 2) the accuracy of species-level niche centroids for individuals likely depends on the  
484 variation in climate zones at which the species exists, so long as individuals and populations are  
485 locally adapted (Araújo and Costa-Pereira 2013). Although most occurrence data is still available  
486 at the species level, new technologies such as GPS tracking offer exciting opportunities for  
487 assessing individual niches over time and across hierarchies of organismal organization (Jetz et  
488 al. 2022; Costa-Pereira et al. 2022) and complement the presented species-level findings.

489  
490 As climate change progresses, species are increasingly being exposed to conditions that are quite  
491 different from those to which they have adapted (Pacifci et al. 2015). Gradual shifts in range  
492 boundaries or phenology allow species to keep pace with long-term changes in climatic means  
493 (La Sorte and Jetz 2012; Rushing et al. 2020; Koleček, Adamík, and Reif 2020). However, niche  
494 tracking is an important tool for species to buffer both the changing mean environmental  
495 conditions and increasing interannual variability associated with climate change by selecting  
496 optimal environmental conditions over short time scales (Román-Palacios and Wiens 2020),  
497 especially for species with narrow thermal or habitat requirements. Our findings reveal a broad  
498 diversity in niche tracking strategies and uncover important functional trait associations with  
499 migratory behavior and body size. This has ecological consequences for the assemblages and  
500 ecosystems that will see different functional perturbations due to the different susceptibility of  
501 niche tracking strategies to climatic change (Barbet-Massin and Jetz 2015). For example, as  
502 niche tracking becomes more difficult with climate change, small-bodied and insectivorous birds  
503 may be especially likely to fail to maintain their niches, resulting in proportional declines of  
504 these species relative to the broader avian community assemblage.

505  
506 Thus, we provide a framework for future studies to assess the degree of tracking both niche  
507 position and breadth and capability for climate change adaptation in many other species globally,  
508 including those from understudied regions with limited available data. However, additional work  
509 is needed to assess how species have already been keeping up with climate change that has  
510 occurred. Understanding how climate change is modifying species' ability to conserve their  
511 niches will be a critical step towards determining which species are most likely to adapt to  
512 increasing short-term variability in climate.

513

514

## 515 **Acknowledgements**

516

517 We thank J. Makinen and M. Lu for their modeling advice and thoughtful comments on the  
518 analyses and J. Wilshire, A. Ranipeta, R. Li, and the Map of Life team at the Yale Center for  
519 Biodiversity and Global Change for implementing the Spatiotemporal Observation Annotation  
520 Tool to annotate occurrence data. We thank F. La Sorte for providing species-level migration

521 distances. We acknowledge funding from NSF grant DEB-1441737 and NASA grants  
522 80NSSC17K0282 and 80NSSC18K0435.

523

## 524 **Data Sharing and Accessibility**

525

526 GBIF data is available for public use online at <https://www.gbif.org/>. Code generated to conduct  
527 the analyses will be made available in a public repository such as Dryad or Figshare.

528

## 529 **References**

530

- 531 Albright, Thomas P., Denis Mutiibwa, Alexander. R. Gerson, Eric Krabbe Smith, William A. Talbot,  
532 Jacqueline J. O’Neill, Andrew E. McKechnie, and Blair O. Wolf. 2017. “Mapping Evaporative  
533 Water Loss in Desert Passerines Reveals an Expanding Threat of Lethal Dehydration.”  
534 *Proceedings of the National Academy of Sciences* 114 (9): 2283–88.  
535 <https://doi.org/10.1073/pnas.1613625114>.
- 536 Albright, Thomas P., Anna M. Pidgeon, Chadwick D. Rittenhouse, Murray K. Clayton, Brian D.  
537 Wardlow, Curtis H. Flather, Patrick D. Culbert, and Volker C. Radeloff. 2010. “Combined  
538 Effects of Heat Waves and Droughts on Avian Communities across the Conterminous United  
539 States.” *Ecosphere* 1 (5): art12. <https://doi.org/10.1890/ES10-00057.1>.
- 540 Araújo, Márcio S., and Raul Costa-Pereira. 2013. “Latitudinal Gradients in Intraspecific Ecological  
541 Diversity.” *Biology Letters* 9 (6): 20130778. <https://doi.org/10.1098/rsbl.2013.0778>.
- 542 Association, American Birding. 2008. “American Birding Association Checklist: Birds of the Continental  
543 United States and Canada.” American Birding Association, Colorado Springs, Colorado.
- 544 Barbet-Massin, Morgane, and Walter Jetz. 2015. “The Effect of Range Changes on the Functional  
545 Turnover, Structure and Diversity of Bird Assemblages under Future Climate Scenarios.” *Global  
546 Change Biology* 21 (8): 2917–28. <https://doi.org/10.1111/gcb.12905>.
- 547 Barnagaud, Jean-Yves, Pierre Gaüzère, Benjamin Zuckerberg, Karine Princé, and Jens-Christian  
548 Svenning. 2017. “Temporal Changes in Bird Functional Diversity across the United States.”  
549 *Oecologia* 185 (4): 737–48. <https://doi.org/10.1007/s00442-017-3967-4>.
- 550 Blonder, Benjamin. 2018. “Hypervolume Concepts in Niche- and Trait-Based Ecology.” *Ecography* 41  
551 (9): 1441–55. <https://doi.org/10.1111/ecog.03187>.
- 552 Blonder, Benjamin, Christine Lamanna, Cyrille Violle, and Brian J. Enquist. 2014. “The N-Dimensional  
553 Hypervolume.” *Global Ecology and Biogeography* 23 (5): 595–609.
- 554 Breheny, Patrick, Woodrow Burchett, and Maintainer Patrick Breheny. 2020. “Package ‘Visreg.’”
- 555 Broggi, Juli, Esa Hohtola, Markku Orell, and Jan-Åke Nilsson. 2005. “Local Adaptation to Winter  
556 Conditions in a Passerine Spreading North: A Common-Garden Approach.” *Evolution* 59 (7):  
557 1600–1603.
- 558 Brown, Matilda JM, Barbara R. Holland, and Greg J. Jordan. 2020. “Hyperoverlap: Detecting Biological  
559 Overlap in n-Dimensional Space.” *Methods in Ecology and Evolution* 11 (4): 513–23.
- 560 Carlson, Ben S., Shay Rotics, Ran Nathan, Martin Wikelski, and Walter Jetz. 2021. “Individual  
561 Environmental Niches in Mobile Organisms.” *Nature Communications* 12 (1): 1–10.
- 562 Clements, James F. 2007. *Clements Checklist of Birds of the World*. Comstock Pub. Associates/Cornell  
563 University Press.
- 564 Cohen, Jeremy M., Daniel Fink, and Benjamin Zuckerberg. 2021. “Extreme Winter Weather Disrupts  
565 Bird Occurrence and Abundance Patterns at Geographic Scales.” *Ecography* 44 (8): 1143–55.
- 566 Cohen, Jeremy M., Marc J. Lajeunesse, and Jason R. Rohr. 2018. “A Global Synthesis of Animal  
567 Phenological Responses to Climate Change.” *Nature Climate Change* 8 (3): 224–28.  
568 <https://doi.org/10.1038/s41558-018-0067-3>.

- 569 Costa-Pereira, Raul, Remington J. Moll, Brett R. Jesmer, and Walter Jetz. 2022. “Animal Tracking  
570 Moves Community Ecology: Opportunities and Challenges.” *Journal of Animal Ecology*.
- 571 Davis, Charles C., Charles G. Willis, Richard B. Primack, and Abraham J. Miller-Rushing. 2010. “The  
572 Importance of Phylogeny to the Study of Phenological Response to Global Climate Change.”  
573 *Philosophical Transactions of the Royal Society B: Biological Sciences* 365 (1555): 3201–13.  
574 <https://doi.org/10.1098/rstb.2010.0130>.
- 575 Eyres, Alison, Katrin Böhning-Gaese, C. David L. Orme, Carsten Rahbek, and Susanne A. Fritz. 2020.  
576 “A Tale of Two Seasons: The Link between Seasonal Migration and Climatic Niches in Passerine  
577 Birds.” *Ecology and Evolution* 10 (21): 11983–97.
- 578 Fandos, Guillermo, Shay Rotics, Nir Sapir, Wolfgang Fiedler, Michael Kaatz, Martin Wikelski, Ran  
579 Nathan, and Damaris Zurell. 2020. “Seasonal Niche Tracking of Climate Emerges at the  
580 Population Level in a Migratory Bird.” *Proceedings of the Royal Society B: Biological Sciences*  
581 287 (1935): 20201799. <https://doi.org/10.1098/rspb.2020.1799>.
- 582 Fandos, Guillermo, and José Luis Tellería. 2020. “Seasonal Niche-Tracking Behaviour of Two Partially  
583 Migratory Passerines.” *Ibis* 162 (2): 307–17.
- 584 Gómez, Camila, Elkin A. Tenorio, Paola Montoya, and Carlos Daniel Cadena. 2016. “Niche-Tracking  
585 Migrants and Niche-Switching Residents: Evolution of Climatic Niches in New World Warblers  
586 (Parulidae).” *Proceedings of the Royal Society B: Biological Sciences* 283 (1824): 20152458.
- 587 Huey, Raymond B., Michael R. Kearney, Andrew Krockenberger, Joseph A. M. Holtum, Mellissa Jess,  
588 and Stephen E. Williams. 2012. “Predicting Organismal Vulnerability to Climate Warming: Roles  
589 of Behaviour, Physiology and Adaptation.” *Philosophical Transactions of the Royal Society B:  
590 Biological Sciences* 367 (1596): 1665–79. <https://doi.org/10.1098/rstb.2012.0005>.
- 591 Hutchinson, G. E. 1957. “The Multivariate Niche.” In *Cold Spring Harbor Symposia on Quantitative  
592 Biology*, 22:415–21.
- 593 Jarzyna, Marta A., Benjamin Zuckerberg, Andrew O. Finley, and William F. Porter. 2016. “Synergistic  
594 Effects of Climate and Land Cover: Grassland Birds Are More Vulnerable to Climate Change.”  
595 *Landscape Ecology* 31 (10): 2275–90. <https://doi.org/10.1007/s10980-016-0399-1>.
- 596 Jetz, Walter, Grigori Tertitski, Roland Kays, Uschi Mueller, Martin Wikelski, Susanne Åkesson, Yury  
597 Anisimov, et al. 2022. “Biological Earth Observation with Animal Sensors.” *Trends in Ecology &  
598 Evolution* 37 (4): 293–98. <https://doi.org/10.1016/j.tree.2021.11.011>.
- 599 Karger, Dirk Nikolaus, Adam M Wilson, Colin Mahony, and Niklaus E Zimmermann. 2021. “Global  
600 Daily 1km Land Surface Precipitation Based on Cloud Cover-Informed Downscaling,” 20.
- 601 Kembel, Steven W., Peter D. Cowan, Matthew R. Helmus, William K. Cornwell, Helene Morlon, David  
602 D. Ackerly, Simon P. Blomberg, and Campbell O. Webb. 2010. “Picante: R Tools for Integrating  
603 Phylogenies and Ecology.” *Bioinformatics* 26 (11): 1463–64.
- 604 Khaliq, Imran, Susanne A. Fritz, Roland Prinzing, Markus Pfenninger, Katrin Böhning-Gaese, and  
605 Christian Hof. 2015. “Global Variation in Thermal Physiology of Birds and Mammals: Evidence  
606 for Phylogenetic Niche Conservatism Only in the Tropics.” *Journal of Biogeography* 42 (11):  
607 2187–96. <https://doi.org/10.1111/jbi.12573>.
- 608 Koleček, Jaroslav, Peter Adamík, and Jiří Reif. 2020. “Shifts in Migration Phenology under Climate  
609 Change: Temperature vs. Abundance Effects in Birds.” *Climatic Change* 159 (2): 177–94.  
610 <https://doi.org/10.1007/s10584-020-02668-8>.
- 611 Krapu, Gary L., David A. Brandt, Paul J. Kinzel, and Aaron T. Pearse. 2014. “Spring Migration Ecology  
612 of the Mid-Continent Sandhill Crane Population with an Emphasis on Use of the Central Platte  
613 River Valley, Nebraska.” *Wildlife Monographs* 189 (1): 1–41.
- 614 La Sorte, Frank A., and Walter Jetz. 2012. “Tracking of Climatic Niche Boundaries under Recent Climate  
615 Change: Niche Tracking under Recent Climate Change.” *Journal of Animal Ecology* 81 (4): 914–  
616 25. <https://doi.org/10.1111/j.1365-2656.2012.01958.x>.
- 617 La Sorte, Frank A., Alison Johnston, Amanda D. Rodewald, Daniel Fink, Andrew Farnsworth, Benjamin  
618 M. Van Doren, Tom Auer, and Matthew Strimas-Mackey. 2022. “The Role of Artificial Light at

- 619 Night and Road Density in Predicting the Seasonal Occurrence of Nocturnally Migrating Birds.”  
620 *Diversity and Distributions*.
- 621 Laube, Irina, Catherine H. Graham, and Katrin Böhning-Gaese. 2015. “Niche Availability in Space and  
622 Time: Migration in *Sylvia* Warblers.” *Journal of Biogeography* 42 (10): 1896–1906.
- 623 Li, Richard, Ajay Ranipeta, John Wilshire, Jeremy Malczyk, Michelle Duong, Robert Guralnick, Adam  
624 Wilson, and Walter Jetz. 2021. “A Cloud-Based Toolbox for the Versatile Environmental  
625 Annotation of Biodiversity Data.” Edited by Andrew J. Tanentzap. *PLOS Biology* 19 (11):  
626 e3001460. <https://doi.org/10.1371/journal.pbio.3001460>.
- 627 Lu, Muyang, Kevin Winner, and Walter Jetz. 2021. “A Unifying Framework for Quantifying and  
628 Comparing N-Dimensional Hypervolumes.” *Methods in Ecology and Evolution* 12 (10): 1953–  
629 68.
- 630 Martínez-Meyer, Enrique, A. Townsend Peterson, and Adolfo G. Navarro-Sigüenza. 2004. “Evolution of  
631 Seasonal Ecological Niches in the Passerina Buntings (Aves: Cardinalidae).” *Proceedings of the  
632 Royal Society of London. Series B: Biological Sciences* 271 (1544): 1151–57.
- 633 Newton, Ian. 2003. *Speciation and Biogeography of Birds*. Academic Press.
- 634 Ooms, Jeroen. 2014. “The Jsonlite Package: A Practical and Consistent Mapping between Json Data and r  
635 Objects.” *ArXiv Preprint ArXiv:1403.2805*.
- 636 Orme, David, R. Freckleton, G. Thomas, T. Petzoldt, S. Fritz, N. Isaac, and W. Pearse. 2013. “The Caper  
637 Package: Comparative Analysis of Phylogenetics and Evolution in R.” *R Package Version 5* (2):  
638 1–36.
- 639 Outlaw, Diana C., and Gary Voelker. 2006. “Phylogenetic Tests of Hypotheses for the Evolution of  
640 Avian Migration: A Case Study Using the Motacillidae.” *The Auk* 123 (2): 455–66.
- 641 Pacifici, Michela, Wendy B. Foden, Piero Visconti, James E. M. Watson, Stuart H.M. Butchart, Kit M.  
642 Kovacs, Brett R. Scheffers, et al. 2015. “Assessing Species Vulnerability to Climate Change.”  
643 *Nature Climate Change* 5 (3): 215–24. <https://doi.org/10.1038/nclimate2448>.
- 644 Ponti, Raquel, Angel Arcones, Xavier Ferrer, and David R. Vieites. 2020. “Seasonal Climatic Niches  
645 Diverge in Migratory Birds.” *Ibis* 162 (2): 318–30.
- 646 Qian, Hong. 2010. “Environment–Richness Relationships for Mammals, Birds, Reptiles, and Amphibians  
647 at Global and Regional Scales.” *Ecological Research* 25 (3): 629–37.
- 648 R Core Team. 2021. *R: A Language and Environment for Statistical Computing*. Vienna, Austria: R  
649 Foundation for Statistical Computing. <https://www.R-project.org/>.
- 650 Rahmstorf, S., and D. Coumou. 2011. “Increase of Extreme Events in a Warming World.” *Proceedings of  
651 the National Academy of Sciences* 108 (44): 17905–9. <https://doi.org/10.1073/pnas.1101766108>.
- 652 Román-Palacios, Cristian, and John J. Wiens. 2020. “Recent Responses to Climate Change Reveal the  
653 Drivers of Species Extinction and Survival.” *Proceedings of the National Academy of Sciences*  
654 117 (8): 4211–17. <https://doi.org/10.1073/pnas.1913007117>.
- 655 Rushing, Clark S., J. Andrew Royle, David J. Ziolkowski, and Keith L. Pardieck. 2020. “Migratory  
656 Behavior and Winter Geography Drive Differential Range Shifts of Eastern Birds in Response to  
657 Recent Climate Change.” *Proceedings of the National Academy of Sciences*, May, 202000299.  
658 <https://doi.org/10.1073/pnas.2000299117>.
- 659 Shew, Justin J., Clayton K. Nielsen, and Donald W. Sparling. 2019. “Finer-Scale Habitat Predicts Nest  
660 Survival in Grassland Birds More than Management and Landscape: A Multi-Scale Perspective.”  
661 *Journal of Applied Ecology* 56 (4): 929–45.
- 662 Shipley, J. Ryan, Cornelia W. Twining, Conor C. Taff, Maren N. Vitousek, Andrea Flack, and David W.  
663 Winkler. 2020. “Birds Advancing Lay Dates with Warming Springs Face Greater Risk of Chick  
664 Mortality.” *Proceedings of the National Academy of Sciences* 117 (41): 25590–94.
- 665 Somveille, Marius, Ana SL Rodrigues, and Andrea Manica. 2015. “Why Do Birds Migrate? A  
666 Macroecological Perspective.” *Global Ecology and Biogeography* 24 (6): 664–74.
- 667 ———. 2018. “Energy Efficiency Drives the Global Seasonal Distribution of Birds.” *Nature Ecology &  
668 Evolution* 2 (6): 962–69.

- 669 Tingley, M. W., W. B. Monahan, S. R. Beissinger, and C. Moritz. 2009. “Birds Track Their Grinnellian  
670 Niche through a Century of Climate Change.” *Proceedings of the National Academy of Sciences*  
671 106 (Supplement\_2): 19637–43. <https://doi.org/10.1073/pnas.0901562106>.
- 672 Ummenhofer, Caroline C., and Gerald A. Meehl. 2017. “Extreme Weather and Climate Events with  
673 Ecological Relevance: A Review.” *Philosophical Transactions of the Royal Society B: Biological*  
674 *Sciences* 372 (1723): 20160135. <https://doi.org/10.1098/rstb.2016.0135>.
- 675 Watanabe, Yuuki Y. 2016. “Flight Mode Affects Allometry of Migration Range in Birds.” *Ecology*  
676 *Letters* 19 (8): 907–14.
- 677 Wickham, Hadley. 2011. “Ggplot2.” *Wiley Interdisciplinary Reviews: Computational Statistics* 3 (2):  
678 180–85.
- 679 Wickham, Hadley, Mara Averick, Jennifer Bryan, Winston Chang, Lucy D’Agostino McGowan, Romain  
680 François, Garrett Golemund, Alex Hayes, Lionel Henry, and Jim Hester. 2019. “Welcome to the  
681 Tidyverse.” *Journal of Open Source Software* 4 (43): 1686.
- 682 Wickham, Hadley, and Maintainer Hadley Wickham. 2020. “Package ‘Httr.’”
- 683 Wilman, Hamish, Jonathan Belmaker, Jennifer Simpson, Carolina de la Rosa, Marcelo M. Rivadeneira,  
684 and Walter Jetz. 2014. “EltonTraits 1.0: Species-Level Foraging Attributes of the World’s Birds  
685 and Mammals: *Ecological Archives* E095-178.” *Ecology* 95 (7): 2027–2027.  
686 <https://doi.org/10.1890/13-1917.1>.
- 687 Winger, Benjamin M., Giorgia G. Auteri, Teresa M. Pegan, and Brian C. Weeks. 2019. “A Long Winter  
688 for the Red Queen: Rethinking the Evolution of Seasonal Migration.” *Biological Reviews* 94 (3):  
689 737–52.
- 690 Winkler, David W, Miles K Luo, and Eldar Rakhimberdiev. 2013. “Temperature Effects on Food Supply  
691 and Chick Mortality in Tree Swallows (*Tachycineta Bicolor*),” 12.
- 692 Zink, Robert M. 2011. “The Evolution of Avian Migration.” *Biological Journal of the Linnean Society*  
693 104 (2): 237–50.
- 694 Zurell, Damaris, Laure Gallien, Catherine H. Graham, and Niklaus E. Zimmermann. 2018. “Do Long-  
695 Distance Migratory Birds Track Their Niche through Seasons?” *Journal of Biogeography* 45 (7):  
696 1459–68. <https://doi.org/10.1111/jbi.13351>.
- 697

## **Supporting Information**

**Title: Diverse strategies for tracking seasonal environmental niches at hemispheric scale**

**Jeremy Cohen<sup>\*1,2</sup> & Walter Jetz<sup>1,2</sup>**

<sup>1</sup>Department of Ecology and Evolutionary Biology, Yale University, 165 Prospect Street, New Haven, CT, 06520 USA

<sup>2</sup>Center for Biodiversity and Global Change, Yale University, 165 Prospect Street, New Haven, CT, 06520 USA

\*Correspondence to: [jeremy3cohen@gmail.com](mailto:jeremy3cohen@gmail.com)

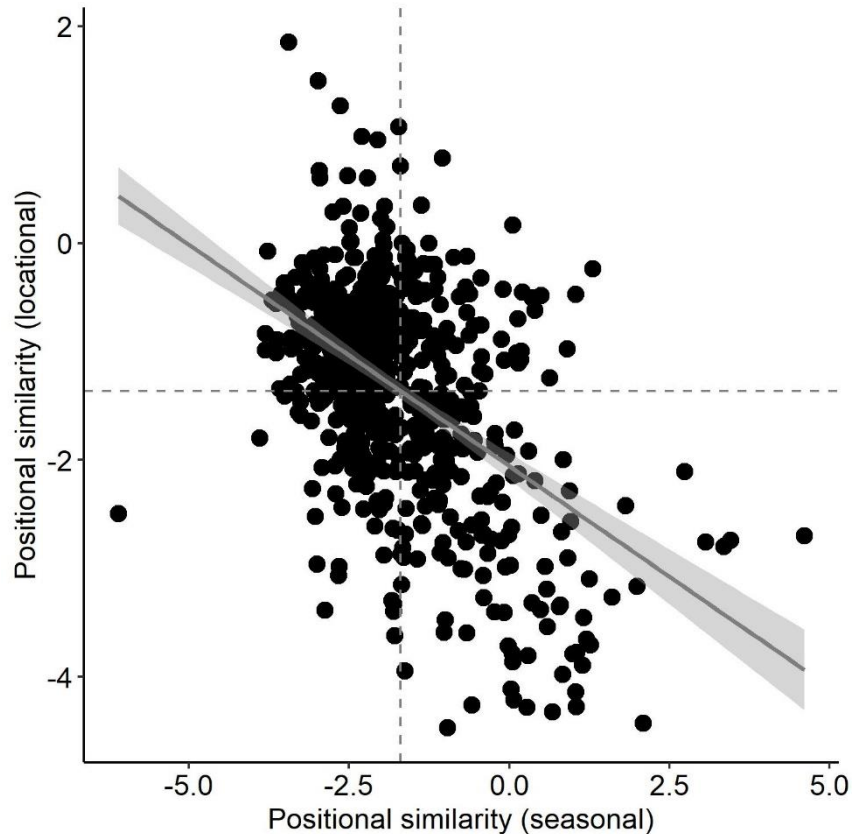

**Figure S1. Seasonal and locational niche centroid similarity are inversely related.** Niche-tracking species maximize niche similarity between breeding and nonbreeding seasons (defined as seasonal similarity, x-axis) and minimize the similarity between the nonbreeding season niche and the stationary winter niche (defined as locational similarity, y-axis). The reverse is true for non-tracker species. Tropical residents are an exception to this rule; these species have overlapping niche space for all three components, thus maximizing both seasonal and locational similarity. Dashed lines represent means and gray shading represents 95% confidence interval for trend line.



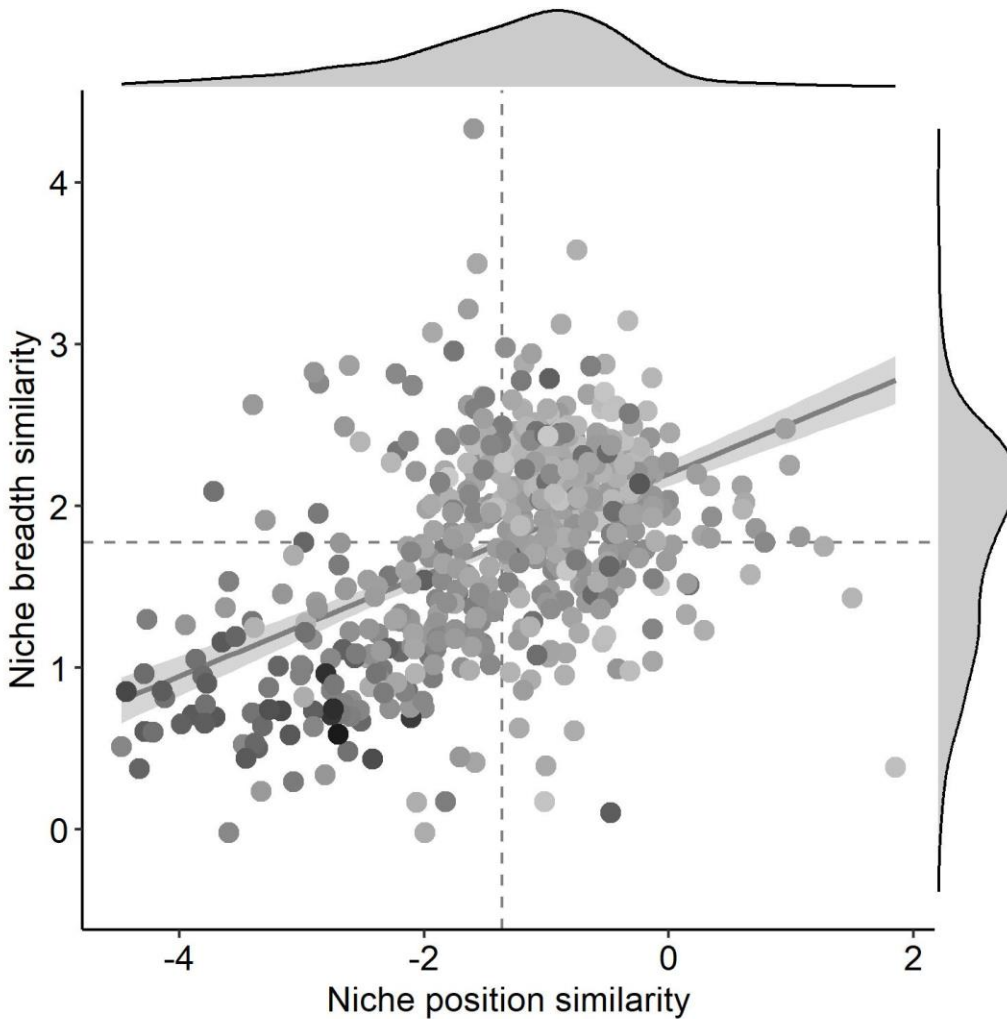

**Figure S2: Interspecific variation in locational niche tracking of niche position and breadth.**

Locational niche similarity represents the similarity of the overwintering niche to the winter conditions at breeding locations. Points represent species-level variation in locational similarity of niche position and breadth between the breeding and overwintering seasons for 619 species of North American birds. Marginal density plots illustrate a positive relationship between tracking locational niche position and breadth. Darker points reflect greater values of seasonal positional niche similarity and are primarily distributed among points with lower values of locational positional similarity.

**Appendix 1.** Seasonal niche dissimilarity for 619 species of North American birds (sorted taxonomically). Dissimilarity is partitioned into Mahalanobis distance and determinant ratio for both seasonal (breeding/overwintering comparison) and locational (overwintering/winter at breeding sites comparison) dissimilarity. Position and breadth similarity (visualized and used in analyses) was generated from these values by ln-transforming and sign-flipping.

**(appendix\_1.csv)**

**Appendix 2.** Updates to avian phylogeny. We updated the avian phylogeny of Jetz et al (2012) to the 2021 Clements taxonomy by harmonizing species names, as follows.

**(appendix\_2.csv)**

**Table S1.** Model tables (pgls and ANOVA) summarizing functional trait drivers of seasonal niche position and breadth similarity across species in multivariate models.

| Mahalanobis distance |             |       |         |         |
|----------------------|-------------|-------|---------|---------|
| PGLS table           | Coefficient | SE    | t-value | p-value |
| Intercept            | -1.745      | 0.270 | -6.472  | <0.001  |
| Migration distance   | 0.428       | 0.041 | 10.359  | <0.001  |
| Body mass (log)      | -0.798      | 0.097 | -8.233  | <0.001  |
| Diet (herbivore)     | -0.647      | 0.178 | -3.626  | <0.001  |
| Diet (insectivore)   | -0.048      | 0.177 | -0.275  | 0.784   |
| Diet (omnivore)      | -0.394      | 0.139 | -2.836  | 0.005   |
| Habitat (generalist) | 0.001       | 0.174 | 0.005   | 0.996   |
| Habitat (open)       | -0.381      | 0.110 | -3.470  | 0.001   |
| Habitat (water)      | 0.364       | 0.172 | 2.110   | 0.035   |

| Mahalanobis distance |    |         |         |
|----------------------|----|---------|---------|
| ANOVA table          | DF | F-value | p-value |
| Intercept            | 1  | 121.713 | <0.001  |
| Migration distance   | 1  | 197.317 | <0.001  |
| Body mass (log)      | 1  | 93.094  | <0.001  |
| Diet                 | 3  | 5.702   | 0.001   |
| Habitat preference   | 3  | 9.675   | <0.001  |

| Determinant ratio    |             |       |         |         |
|----------------------|-------------|-------|---------|---------|
| PGLS table           | Coefficient | SE    | t-value | p-value |
| Intercept            | 1.360       | 0.262 | 5.183   | <0.001  |
| Migration distance   | 0.250       | 0.040 | 6.212   | <0.001  |
| Body mass (log)      | 0.525       | 0.094 | 5.565   | <0.001  |
| Diet (herbivore)     | -0.053      | 0.174 | -0.305  | 0.760   |
| Diet (insectivore)   | 0.206       | 0.172 | 1.196   | 0.232   |
| Diet (omnivore)      | 0.102       | 0.135 | 0.754   | 0.451   |
| Habitat (generalist) | -0.081      | 0.169 | -0.481  | 0.631   |
| Habitat (open)       | -0.400      | 0.107 | -3.738  | <0.001  |
| Habitat (water)      | 0.319       | 0.168 | 1.905   | 0.057   |

| Determinant ratio  |    |         |         |
|--------------------|----|---------|---------|
| ANOVA table        | DF | F-value | p-value |
| Intercept          | 1  | 185.261 | <0.001  |
| Migration distance | 1  | 37.702  | <0.001  |
| Body mass (log)    | 1  | 51.669  | <0.001  |
| Diet               | 3  | 2.201   | 0.087   |

|                           |   |        |        |
|---------------------------|---|--------|--------|
| <u>Habitat preference</u> | 3 | 10.145 | <0.001 |
|---------------------------|---|--------|--------|

**Table S2.** Model tables (pgls and ANOVA) summarizing functional trait drivers of locational niche position similarity across species in multivariate models.

---

| Mahalanobis distance |             |       |         |         |
|----------------------|-------------|-------|---------|---------|
| PGLS table           | Coefficient | SE    | t-value | p-value |
| Intercept            | 0.182       | 0.282 | 0.645   | 0.519   |
| Migration distance   | -0.331      | 0.043 | -7.660  | <0.001  |
| Body mass (log)      | 0.952       | 0.101 | 9.389   | <0.001  |
| Diet (herbivore)     | -0.215      | 0.187 | -1.155  | 0.249   |
| Diet (insectivore)   | -0.176      | 0.185 | -0.956  | 0.340   |
| Diet (omnivore)      | -0.092      | 0.145 | -0.637  | 0.524   |
| Habitat (generalist) | 0.822       | 0.182 | 4.519   | <0.001  |
| Habitat (open)       | 0.415       | 0.115 | 3.609   | <0.001  |
| Habitat (water)      | 0.515       | 0.180 | 2.861   | 0.004   |

---

---

| Mahalanobis distance |    |         |         |
|----------------------|----|---------|---------|
| ANOVA table          | DF | F-value | p-value |
| Intercept            | 1  | 11.162  | 0.001   |
| Migration distance   | 1  | 111.730 | <0.001  |
| Body mass (log)      | 1  | 111.154 | <0.001  |
| Diet                 | 3  | 0.703   | 0.551   |
| Habitat preference   | 3  | 7.757   | <0.001  |

---

**Table S3.** Model tables (ppls) summarizing functional trait drivers of seasonal niche position and breadth similarity across species in univariate models.

| Mahalonobis distance |             |       |         |         |
|----------------------|-------------|-------|---------|---------|
| PGLS table           | Coefficient | SE    | t-value | p-value |
| Intercept            | -3.060      | 0.214 | -14.291 | 0.000   |
| Migration distance   | 0.539       | 0.042 | 12.747  | 0.000   |

| Mahalonobis distance |             |       |         |         |
|----------------------|-------------|-------|---------|---------|
| PGLS table           | Coefficient | SE    | t-value | p-value |
| Intercept            | -1.039      | 0.219 | -4.744  | 0.000   |
| Body mass (log)      | -1.057      | 0.097 | -10.883 | 0.000   |

| Mahalonobis distance |             |       |         |         |
|----------------------|-------------|-------|---------|---------|
| PGLS table           | Coefficient | SE    | t-value | p-value |
| (Intercept)          | -1.254      | 0.257 | -4.876  | 0.000   |
| Diet (herbivore)     | -1.287      | 0.202 | -6.380  | 0.000   |
| Diet (insectivore)   | 0.085       | 0.208 | 0.410   | 0.682   |
| Diet (omnivore)      | -0.681      | 0.155 | -4.409  | 0.000   |

| Mahalonobis distance |             |       |         |         |
|----------------------|-------------|-------|---------|---------|
| PGLS table           | Coefficient | SE    | t-value | p-value |
| Intercept            | -1.864      | 0.260 | -7.168  | 0.000   |
| Habitat (generalist) | -0.356      | 0.211 | -1.684  | 0.093   |
| Habitat (open)       | -0.375      | 0.134 | -2.796  | 0.005   |
| Habitat (water)      | 0.121       | 0.208 | 0.578   | 0.563   |

| Determinant ratio PGLS |             |       |         |         |
|------------------------|-------------|-------|---------|---------|
| table                  | Coefficient | SE    | t-value | p-value |
| Intercept              | 1.891       | 0.201 | 9.393   | <0.001  |
| Migration distance     | 0.229       | 0.040 | 5.770   | <0.001  |

| Determinant ratio PGLS |             |       |         |         |
|------------------------|-------------|-------|---------|---------|
| table                  | Coefficient | SE    | t-value | p-value |
| Intercept              | 1.938       | 0.201 | 9.659   | <0.001  |
| Body mass (log)        | 0.480       | 0.089 | 5.397   | <0.001  |

---

| Determinant ratio PGLS |             |       |         |         |
|------------------------|-------------|-------|---------|---------|
| table                  | Coefficient | SE    | t-value | p-value |
| (Intercept)            | 2.092       | 0.227 | 9.213   | <0.001  |
| Diet (herbivore)       | 0.071       | 0.178 | 0.401   | 0.688   |
| Diet (insectivore)     | 0.354       | 0.183 | 1.934   | 0.054   |
| Diet (omnivore)        | 0.435       | 0.136 | 3.190   | 0.001   |

---

| Determinant ratio PGLS |             |       |         |         |
|------------------------|-------------|-------|---------|---------|
| table                  | Coefficient | SE    | t-value | p-value |
| Intercept              | 2.304       | 0.218 | 10.572  | <0.001  |
| Habitat (generalist)   | -0.161      | 0.177 | -0.909  | 0.364   |
| Habitat (open)         | -0.437      | 0.113 | -3.881  | <0.001  |
| Habitat (water)        | 0.499       | 0.175 | 2.858   | 0.004   |

---

**Table S4.** Model tables (pgls) summarizing functional trait drivers of locational niche position similarity across species in univariate models.

| Mahalonobis         |             |       |         |         |
|---------------------|-------------|-------|---------|---------|
| distance PGLS table | Coefficient | SE    | t-value | p-value |
| Intercept           | 1.485       | 0.224 | 6.643   | <0.001  |
| Migration distance  | -0.424      | 0.044 | -9.610  | <0.001  |

  

| Mahalonobis         |             |       |         |         |
|---------------------|-------------|-------|---------|---------|
| distance PGLS table | Coefficient | SE    | t-value | p-value |
| Intercept           | -0.357      | 0.215 | -1.658  | 0.098   |
| Body mass (log)     | 1.119       | 0.095 | 11.721  | <0.001  |

  

| Mahalonobis         |             |       |         |         |
|---------------------|-------------|-------|---------|---------|
| distance PGLS table | Coefficient | SE    | t-value | p-value |
| (Intercept)         | 0.331       | 0.265 | 1.252   | 0.211   |
| Diet (herbivore)    | 0.521       | 0.208 | 2.510   | 0.012   |
| Diet (insectivore)  | -0.255      | 0.214 | -1.194  | 0.233   |
| Diet (omnivore)     | 0.351       | 0.159 | 2.207   | 0.028   |

  

| Mahalonobis          |             |       |         |         |
|----------------------|-------------|-------|---------|---------|
| distance PGLS table  | Coefficient | SE    | t-value | p-value |
| Intercept            | 0.091       | 0.256 | 0.354   | 0.723   |
| Habitat (generalist) | 1.068       | 0.208 | 5.124   | <0.001  |
| Habitat (open)       | 0.408       | 0.132 | 3.085   | 0.002   |
| Habitat (water)      | 0.774       | 0.205 | 3.770   | <0.001  |



**Table S5.** Metrics describing phylogenetic signal in seasonal niche tracking. Asterisks denote significance level (\*\*\*) < 0.001 < \*\* < 0.01 < \* < 0.05).

|                      | Blomberg's K           |                          | Lambda                 |                          |
|----------------------|------------------------|--------------------------|------------------------|--------------------------|
|                      | Seasonal dissimilarity | Locational dissimilarity | Seasonal dissimilarity | Locational dissimilarity |
| Mahalanobis distance | 0.083***               | 0.115***                 | 0.664***               | 0.663***                 |
| Determinant Ratio    | 0.057*                 |                          | 0.278***               |                          |
